# Supplementary material for: Complete Genome Sequence and Pan-Genome Analysis of Shewanella oncorhynchi Z-P2, a Siderophore Putrebactin-Producing Bacterium
Source: MDPI journal article supplement (doi:10.3390/microorganisms11122961), 2023-12-11
Supplement: s1 [file s1]

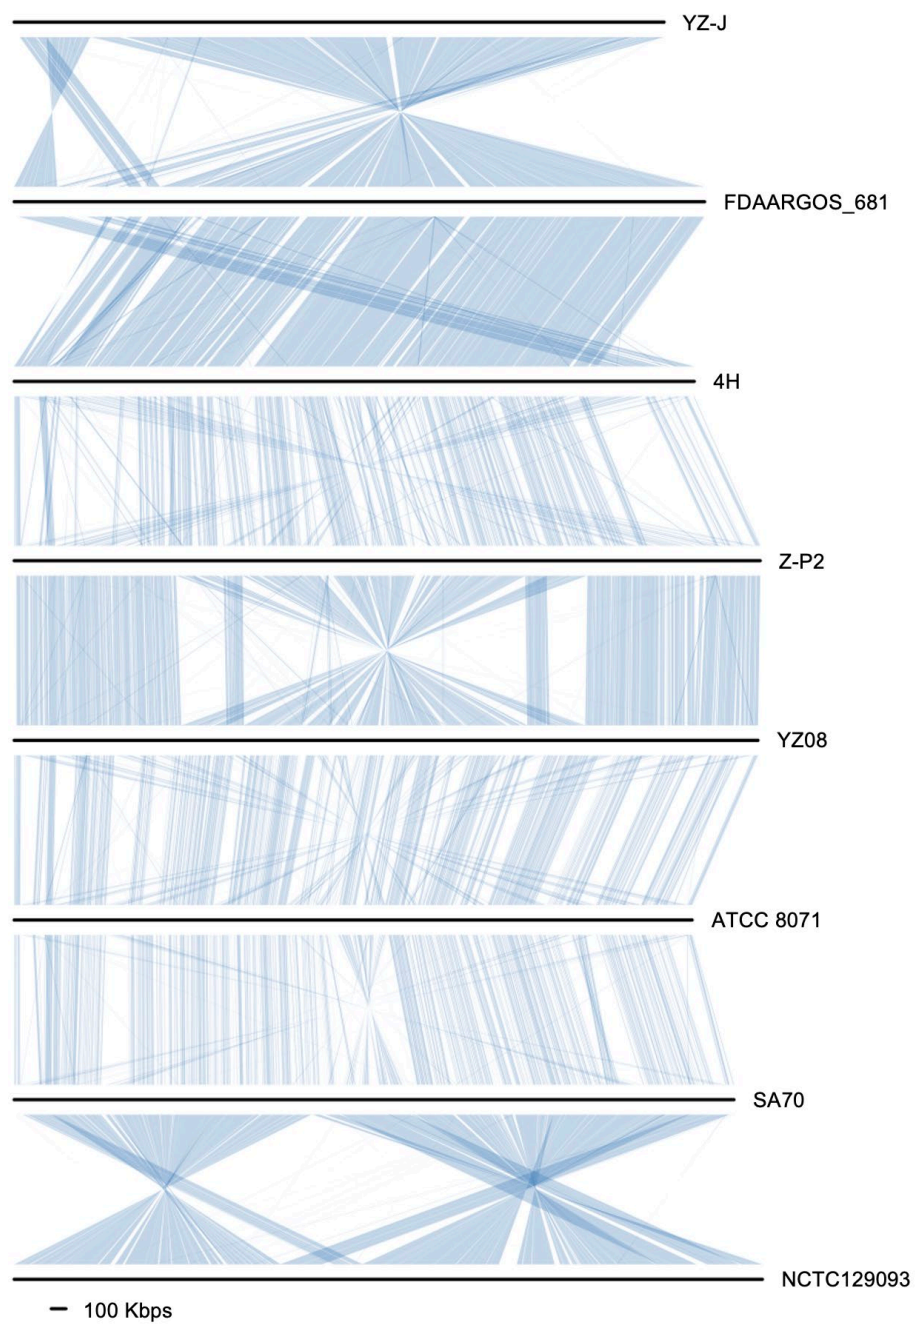

**Figure S1.** Genome synteny analysis of *Shewanella oncorhynchi* Z-P2 and *S. putrefaciens* strains. Collinear blocks between the two strains are linked by lines.

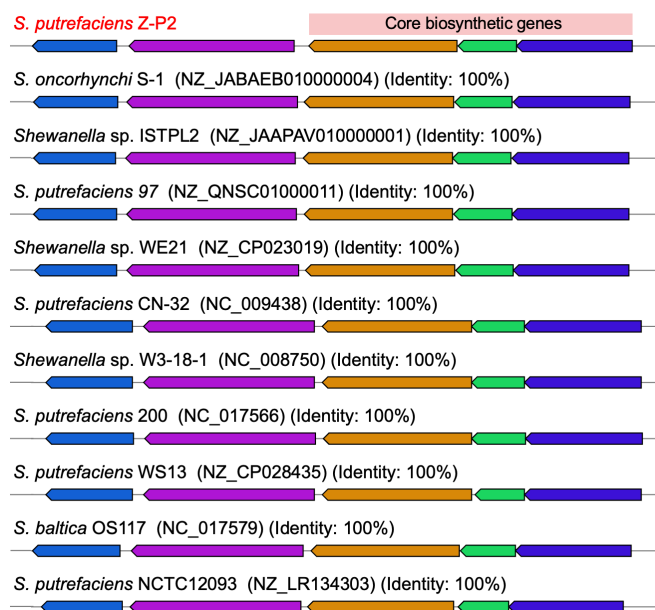

**Figure S2.** Comparative analysis with putrebactin biosynthetic gene clusters of *Shewanella* strains.

**Table S1.** List of *S. putrefaciens* genomes analyzed.

| No. | Strain       | NCBI accession  | Genome size (Mb) | GC (%) |
|-----|--------------|-----------------|------------------|--------|
| 1   | 4H           | GCA_025402875.1 | 4.6              | 44.5   |
| 2   | ATCC 8071    | GCA_016406325.1 | 4.4              | 44     |
| 3   | NCTC129093   | GCA_900636665.1 | 5                | 47.5   |
| 4   | YZ08         | GCA_019599085.1 | 5.1              | 46     |
| 5   | SA70         | GCA_002157365.2 | 5.3              | 47.5   |
| 6   | FDAARGOS_681 | GCA_009730575.1 | 4.7              | 44     |
| 7   | CGMCC-1.6515 | GCA_016406305.1 | 4.6              | 47     |
| 8   | XY07         | GCA_017068195.1 | 4.4              | 44     |
| 9   | YZ-J         | GCA_019599125.1 | 4.4              | 44     |
| 10  | WS13         | GCA_003044255.1 | 4.4              | 44     |

**Table S2.** Details of the genomic islands of the *S. oncorhynchi* Z-P2 genome.

| Island location     | Length<br>(bp) | GC%   | Gene<br>numbers | Gene ID                                                                                                                                                                                                                                                                                                                                                                                                                                                                                                                                                                                                                                                                                                                                                                       | Product                                                                                                                                                                                                                                                                                                                                                                   |
|---------------------|----------------|-------|-----------------|-------------------------------------------------------------------------------------------------------------------------------------------------------------------------------------------------------------------------------------------------------------------------------------------------------------------------------------------------------------------------------------------------------------------------------------------------------------------------------------------------------------------------------------------------------------------------------------------------------------------------------------------------------------------------------------------------------------------------------------------------------------------------------|---------------------------------------------------------------------------------------------------------------------------------------------------------------------------------------------------------------------------------------------------------------------------------------------------------------------------------------------------------------------------|
| 806,970-815,269     | 8,300          | 43.84 | 7               | RA178_03755, RA178_03760,<br>RA178_03765, RA178_03770,<br>RA178_03775, RA178_03780,<br>RA178_03785                                                                                                                                                                                                                                                                                                                                                                                                                                                                                                                                                                                                                                                                            | site-specific integrase                                                                                                                                                                                                                                                                                                                                                   |
| 1,370,953-1,416,822 | 45,870         | 38.54 | 49              | RA178_06125, RA178_06130,<br>RA178_06135, RA178_06140,<br>RA178_06145, RA178_06150,<br>RA178_06155, RA178_06160,<br>RA178_06165, RA178_06170,<br>RA178_06175, RA178_06180,<br>RA178_06185, RA178_06190,<br>RA178_06195, RA178_06200,<br>RA178_06205, RA178_06210,<br>RA178_06215, RA178_06220,<br>RA178_06225, RA178_06230,<br>RA178_06235, RA178_06240,<br>RA178_06245, RA178_06250,<br>RA178_06255, RA178_06260,<br>RA178_06265, RA178_06270,<br>RA178_06275, RA178_06280,<br>RA178_06285, RA178_06290,<br>RA178_06295, RA178_06300,<br>RA178_06305, RA178_06310,<br>RA178_06315, RA178_06320,<br>RA178_06325, RA178_06330,<br>RA178_06335, RA178_06340,<br>RA178_06345, RA178_06350,<br>RA178_06355, RA178_06360,<br>RA178_06365, RA178_06370,<br>RA178_06375, RA178_06380 | carbon storage regulator CsrA, tRNA-Ser, tRNA-Arg, Kila-N domain-containing protein, helix-turn-helix domain-containing protein, DNA-directed RNA polymerase, P27 family phage terminase small subunit, terminase large subunit, phage portal protein, phage major capsid protein, head-tail connector protein, tail fiber domain-containing protein, valine--tRNA ligase |
| 2,068,129-2,094,117 | 25,989         | 47.2  | 24              | RA178_09370, RA178_09375,<br>RA178_09380, RA178_09385,<br>RA178_09390, RA178_09395,<br>RA178_09400, RA178_09405,<br>RA178_09410, RA178_09415,<br>RA178_09420, RA178_09425,<br>RA178_09430, RA178_09435,<br>RA178_09440, RA178_09445,<br>RA178_09450, RA178_09455,<br>RA178_09460, RA178_09465                                                                                                                                                                                                                                                                                                                                                                                                                                                                                 | helix-turn-helix domain-containing protein, replication protein P, tyrosine-type recombinase/integrase, helix-turn-helix transcriptional regulator, CRISPR-associated endonuclease Cas2, CRISPR system precrRNA processing endonuclease RAMP protein Cas6, CRISPR-associated protein Csx3, RAMP superfamily CRISPR-associated protein, SOS                                |

|                     |        |       |    |  |                                                                                                                                                                                                                                                                                                                                                                                                                                                                                                                                                                                                                                                                                                                                                                                                                                                                                                                                   |
|---------------------|--------|-------|----|--|-----------------------------------------------------------------------------------------------------------------------------------------------------------------------------------------------------------------------------------------------------------------------------------------------------------------------------------------------------------------------------------------------------------------------------------------------------------------------------------------------------------------------------------------------------------------------------------------------------------------------------------------------------------------------------------------------------------------------------------------------------------------------------------------------------------------------------------------------------------------------------------------------------------------------------------|
|                     |        |       |    |  | RA178_09470, RA178_09475, response-associated peptidase family<br>RA178_09480, RA178_09485 protein                                                                                                                                                                                                                                                                                                                                                                                                                                                                                                                                                                                                                                                                                                                                                                                                                                |
| 2,103,837-2,117,630 | 13,794 | 46.42 | 22 |  | RA178_09535, RA178_09540, DGQHR domain-containing protein,<br>RA178_09545, RA178_09550, helix-turn-helix transcriptional<br>RA178_09555, RA178_09560, regulator, Cro/CI family<br>RA178_09565, RA178_09570, transcriptional regulator, helix-turn-<br>RA178_09575, RA178_09580, helix domain-containing protein,<br>RA178_09585, RA178_09590, replication protein P, tyrosine-type<br>RA178_09595, RA178_09600, recombinase/integrase<br>RA178_09605, RA178_09610,<br>RA178_09615, RA178_09620,<br>RA178_09625, RA178_09630,<br>RA178_09635, RA178_09640                                                                                                                                                                                                                                                                                                                                                                          |
| 2,709,139-2,742,614 | 33,476 | 39.62 | 27 |  | RA178_12230, RA178_12235, site-specific integrase, HDOD<br>RA178_12240, RA178_12245, domain-containing protein, tyrosine-<br>RA178_12250, RA178_12255, type recombinase/integrase, helix-<br>RA178_12260, RA178_12265, turn-helix transcriptional regulator,<br>RA178_12270, RA178_12275, IS3 family transposase, Na <sup>+</sup> /H <sup>+</sup><br>RA178_12280, RA178_12285, antiporter, transposase,<br>RA178_12290, RA178_12295, amidohydrolase family protein,<br>RA178_12300, RA178_12305, FimD/PapC C-terminal domain-<br>RA178_12310, RA178_12315, containing protein, fimbria/pilus outer<br>RA178_12320, RA178_12325, membrane usher protein, molecular<br>RA178_12330, RA178_12335, chaperone, transporter substrate-<br>RA178_12340, RA178_12345, binding domain-containing protein,<br>RA178_12350, RA178_12355, response regulator transcription factor,<br>RA178_12360 EAL domain-containing response<br>regulator |
| 2,744,216-2,756,057 | 11,842 | 42.93 | 10 |  | RA178_12375, RA178_12380, thioredoxin family protein,<br>RA178_12385, RA178_12390, thioredoxin family protein,<br>RA178_12395, RA178_12400, metalloregulator ArsR/SmtB family<br>RA178_12405, RA178_12410, transcription factor, transposase, linear<br>RA178_12415, RA178_12420 amide C-N hydrolase, aspartate-<br>alanine antiporter, glutamate<br>decarboxylase, IS3 family<br>transposase, TolC family protein,<br>FUSC family protein, multidrug<br>transporter subunit MdtN                                                                                                                                                                                                                                                                                                                                                                                                                                                 |
| 3,382,746-3,403,945 | 21,200 | 49.82 | 7  |  | RA178_15260, RA178_15265, 4'-phosphopantetheinyl transferase<br>RA178_15270, RA178_15275, superfamily protein, transcriptional<br>RA178_15280, RA178_15285, regulator, beta-ketoacyl synthase N-<br>RA178_15290 terminal-like, PfaB family protein,<br>eicosapentaenoate synthase subunit<br>PfaD                                                                                                                                                                                                                                                                                                                                                                                                                                                                                                                                                                                                                                 |

|                     |        |       |   |                                                                                                                                                                                                                                                                                                              |
|---------------------|--------|-------|---|--------------------------------------------------------------------------------------------------------------------------------------------------------------------------------------------------------------------------------------------------------------------------------------------------------------|
| 4,592,104-4,603,039 | 10,936 | 38.26 | 7 | RA178_20255, RA178_20260, DDE-type<br>RA178_20265, RA178_20270, integrase/transposase/recombinase,<br>RA178_20275, RA178_20280, TniB family NTP-binding protein,<br>RA178_20285 TniQ family protein, UvrD-helicase<br>domain-containing protein, WYL<br>domain-containing protein, DUF2220<br>family protein |
|---------------------|--------|-------|---|--------------------------------------------------------------------------------------------------------------------------------------------------------------------------------------------------------------------------------------------------------------------------------------------------------------|

---

**Table S3.** The virulence factors genes of the *S. oncorhynchi* Z-P2 genome.

| Gene location       | Length | Identity | VFDB ID   | VF ID  | VF name                    | Related gene                                                                                       |
|---------------------|--------|----------|-----------|--------|----------------------------|----------------------------------------------------------------------------------------------------|
| (bp)                |        |          |           |        |                            |                                                                                                    |
| 5,645-7,462         | 1,818  | 98.5     | VFG041976 | SS008  | T3SS                       | RSpl236 hypothetical protein                                                                       |
| 175,466-177,031     | 1,566  | 70.1     | VFG038278 | CVF780 | T2SS                       | <i>exeE</i> general secretion pathway protein E                                                    |
| 178,321-178,755     | 435    | 78.3     | VFG038284 | SS209  | <i>exe</i>                 | <i>exeG</i> general secretion pathway protein G                                                    |
| 230,308-231,492     | 1,185  | 81.9     | VFG046474 | CVF827 | EF-Tu                      | <i>OOM_0626</i> elongation factor                                                                  |
| 247,014-248,252     | 1,239  | 81.7     | VFG046474 | CVF827 | EF-Tu                      | <i>OOM_0626</i> elongation factor                                                                  |
| 480,125-481,099     | 975    | 75.3     | VFG013197 | CVF506 | Heme biosynthesis          | <i>hemB</i> Porphobilinogen synthase                                                               |
| 703,272-704,909     | 1,638  | 73.3     | VFG001855 | VF0159 | Hsp60                      | <i>htpB</i> Hsp60, 60K heat shock protein HtpB                                                     |
| 1,360,983-1,361,963 | 981    | 81.3     | VFG000477 | VF0112 | RpoS                       | <i>rpoS</i> sigma S (sigma 38) factor of RNA polymerase, major sigmafactor during stationary phase |
| 1,370,953-1,371,150 | 198    | 77       | VFG010906 | CVF362 | Carbon storage regulator A | <i>csrA</i> global regulator (carbon storage regulator)                                            |
| 1,503,467-1,504,504 | 1,038  | 80.8     | VFG038466 | CVF783 | Tap type IV pili           | <i>IVtapT</i> Pilus retraction ATPase PilT                                                         |
| 1,588,990-1,589,910 | 921    | 70.7     | VFG038817 | CVF786 | Polar flagella             | <i>cheV</i> two-component system response regulator CheV                                           |
| 1,591,398-1,591,814 | 417    | 74.6     | VFG038803 | AI144  | ND                         | <i>flgC</i> flagellar basal body rod protein FlgC                                                  |
| 1,613,132-1,614,184 | 1,053  | 77.1     | VFG038633 | CVF786 | Polar flagella             | <i>fliG</i> flagellar motor switch protein FliG                                                    |
| 1,615,135-1,616,472 | 1,338  | 71.7     | VFG038641 | CVF786 | Polar flagella             | <i>fliI</i> flagellar protein export ATPase FliI                                                   |
| 1,619,725-1,620,753 | 1,029  | 78.2     | VFG038656 | CVF786 | Polar flagella             | <i>fliM</i> flagellar motor switch protein FliM                                                    |
| 1,620,765-1,621,145 | 381    | 81.7     | VFG038660 | CVF786 | Polar flagella             | <i>fliN</i> polar flagellar switch protein FliN                                                    |
| 1,624,769-1,626,868 | 2,100  | 70.8     | VFG038685 | CVF786 | Polar flagella             | <i>flhA</i> flagellar biosynthesis protein FlhA                                                    |
| 1,628,267-1,629,148 | 882    | 74.4     | VFG038691 | VF0473 | Polar flagella             | <i>flhG</i> flagellar-related protein                                                              |
| 1,629,914-1,630,285 | 371    | 92.6     | VFG007568 | VF0519 | Flagella                   | <i>cheY</i> chemotaxis protein CheY                                                                |
| 1,636,833-1,637,327 | 495    | 80.1     | VFG043204 | AI144  | ND                         | <i>cheW-2</i> chemotaxis protein CheW                                                              |

|                     |       |      |           |        |                   |                                                                                                      |
|---------------------|-------|------|-----------|--------|-------------------|------------------------------------------------------------------------------------------------------|
| 1,650,810-1,651,889 | 1,080 | 72.9 | VFG037923 | CVF775 | Capsule           | <i>M3Q_285</i> nucleoside-diphosphate sugar epimerase                                                |
| 1,651,966-1,652,841 | 876   | 76.2 | VFG037938 | CVF775 | Capsule           | <i>M3Q_286</i> bifunctional UDP-N-acetylglucosamine pyrophosphorylase                                |
| 1,662,978-1,664,144 | 1,167 | 77.3 | VFG048789 | CVF854 | Capsule           | <i>A225_3877</i> UDP-glucose dehydrogenase                                                           |
| 2,190,392-2,190,823 | 432   | 73   | VFG000478 | VF0113 | Fur               | <i>fur</i> transcriptional repressor of iron-responsive genes (Fur family) (ferric uptake regulator) |
| 3,067,432-3,068,178 | 747   | 76.2 | VFG038840 | VF0473 | Polar flagella    | <i>flmH</i> flagellar-related 3-oxoacyl-ACP reductase                                                |
| 3,487,184-3,487,951 | 768   | 71.4 | VFG007601 | CVF281 | Flagella          | <i>motA</i> flagellar motor protein                                                                  |
| 3,788,422-3,790,995 | 2,574 | 77.1 | VFG049190 | CVF861 | T6SS-II           | <i>KOX_00005</i> protein disaggregation chaperone                                                    |
| 3,890,242-3,890,712 | 471   | 78.2 | VFG018243 | CVF628 | AI-2              | <i>luxS</i> S-ribosylhomocysteinase                                                                  |
| 4,099,459-4,100,307 | 849   | 70.9 | VFG013465 | CVF494 | LOS               | <i>kdsA</i> 2-dehydro-3-deoxyphosphooctonate aldolase                                                |
| 4,448,306-4,449,370 | 1,065 | 74.6 | VFG013200 | CVF506 | Heme biosynthesis | <i>hemE</i> uroporphyrinogen decarboxylase                                                           |
